# Supplementary material for: Expression Pattern and Prognostic Significance of Aldehyde Dehydrogenase 2 in Lung Adenocarcinoma as a Potential Predictor of Immunotherapy Efficacy
Source: PubMed Central journal article supplement — Cancer Innov. 2024 Dec 5;4(1):e149. doi: 10.1002/cai2.149 (PMC11620833; doi:10.1002/cai2.149), 2024-12-05
Supplement: CAI2-4-e149-s002.pdf [file CAI2-4-e149-s002.pdf]

**Supplementary Table 1** List of genes correlated with ALDH2 in LUAD

| Correlated Gene | Cytoband      | Spearman's Correlation | $p$ -value | $q$ -value |
|-----------------|---------------|------------------------|------------|------------|
| SELENBP1        | 1q21.3        | 0.652                  | 3.39e-29   | 6.76e-25   |
| RAP1GAP         | 1p36.12       | 0.596                  | 1.59e-23   | 1.58e-19   |
| PLA2G10         | 16p13.12      | 0.590                  | 5.35e-23   | 3.55e-19   |
| FOLR1           | 11q13.4       | 0.574                  | 1.46e-21   | 7.25e-18   |
| C16ORF89        | 16p13.3       | 0.570                  | 3.38e-21   | 1.35e-17   |
| KPNA2           | 17q24.2       | -0.561                 | 1.65e-20   | 4.84e-17   |
| ANLN            | 7p14.2        | -0.561                 | 1.70e-20   | 4.84e-17   |
| DLGAP5          | 14q22.3       | -0.558                 | 3.18e-20   | 7.92e-17   |
| PRR11           | 17q22         | -0.555                 | 5.82e-20   | 1.11e-16   |
| BUB1            | 2q13          | -0.555                 | 5.90e-20   | 1.11e-16   |
| TMEM125         | 1p34.2        | 0.554                  | 6.12e-20   | 1.11e-16   |
| CKAP2L          | 2q14.1        | -0.552                 | 9.63e-20   | 1.54e-16   |
| TMEM163         | 2q21.3        | 0.552                  | 1.00e-19   | 1.54e-16   |
| SEMA3A          | 7q21.11       | -0.549                 | 1.78e-19   | 2.30e-16   |
| GJB1            | Xq13.1        | 0.549                  | 1.81e-19   | 2.30e-16   |
| CALU            | 7q32.1        | -0.548                 | 1.85e-19   | 2.30e-16   |
| CFAP221         | 2q14.2        | 0.546                  | 2.99e-19   | 3.50e-16   |
| KIF15           | 3p21.31       | -0.545                 | 3.33e-19   | 3.68e-16   |
| WDHD1           | 14q22.2-q22.3 | -0.545                 | 3.57e-19   | 3.74e-16   |
| LDHD            | 16q23.1       | 0.541                  | 6.69e-19   | 6.65e-16   |
| PXMP4           | 20q11.22      | 0.540                  | 8.00e-19   | 7.59e-16   |
| ACSM3           | 16p12.3       | 0.539                  | 1.01e-18   | 9.14e-16   |
| GPRC5C          | 17q25.1       | 0.539                  | 1.06e-18   | 9.14e-16   |
| UHRF1           | 19p13.3       | -0.538                 | 1.12e-18   | 9.27e-16   |
| DEPDC1          | 1p31.3        | -0.538                 | 1.23e-18   | 9.82e-16   |
